# Supplementary material for: Preparation and catalytic properties of porous CoP nanoflakes via a low-temperature phosphidation route
Source: Royal Society of Chemistry journal article supplement (doi:10.1039/c6ce00635c), 2016-01-01
Supplement: c6ce00635c1.pdf [file c6ce00635c1.pdf]

## Supporting Information

### Preparation and catalytic properties of porous CoP nanoflakes via a low-temperature phosphidation route

Dican Lu,<sup>1</sup> Yonghong Ni,<sup>\*1</sup> Hao Wu,<sup>1</sup> Meifang Wang<sup>1,2</sup> and Enhong Sheng<sup>1</sup>

<sup>1</sup> College of Chemistry and Materials Science, Key Laboratory of Functional Molecular Solids of Ministry of Education, Anhui Laboratory of Molecule-Based Materials, Anhui Normal University, Wuhu, 241000, PR China.

<sup>2</sup> Wannan Medical College, Wuhu, 241000, PR China

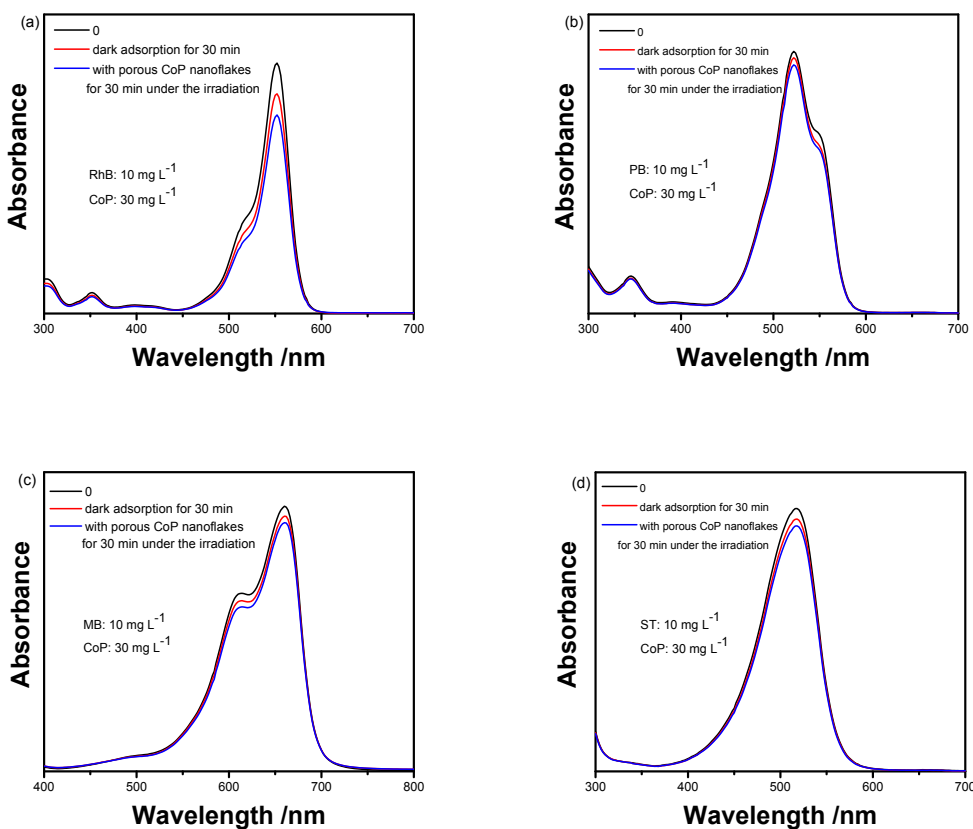

**Figure S1** UV-Vis absorption spectra of RhB (a), PB (b), MB (c) and ST (d) in the dark after adsorption for 30 min and under the irradiation of 365 nm UV light for 30 min in the presence of 30 mg L<sup>-1</sup> of CoP nanoflakes.

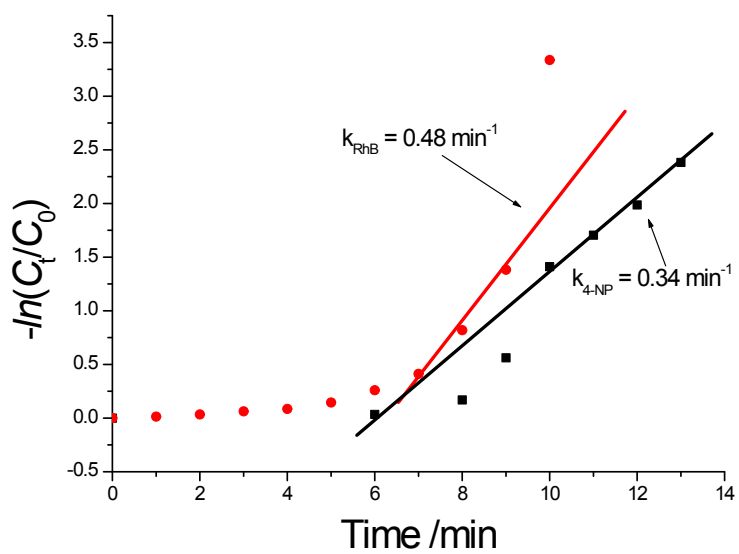

**Figure S2** The linear relationships between  $\ln(C_t/C_0)$  and the reaction time in the reduction of 4-NP and RhB.

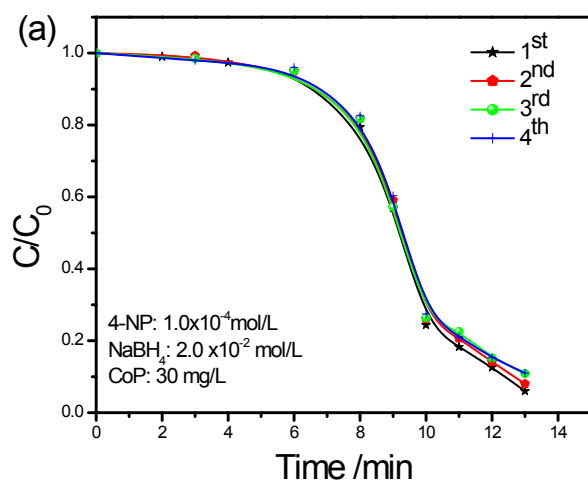

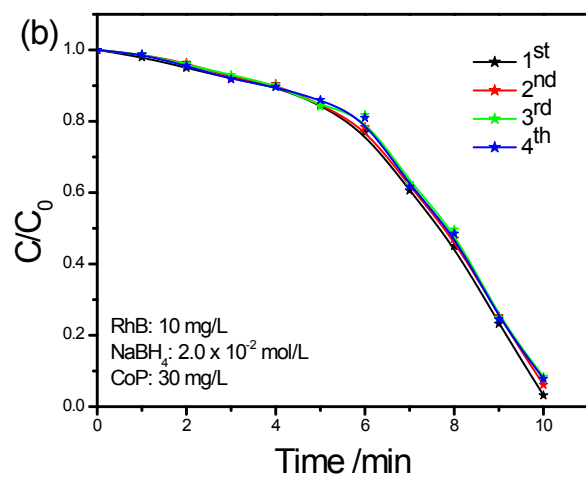

**Figure S3** The stability of the catalyst in the reduction of 4-NP and RhB.
